# Supplementary material
Source: Springer Nature journal article supplement (https://www.springermedizin.de/resource/supplementary/12981_2007_70_MOESM2_ESM.pdf/9603792)

Probability of free from HAART resumption

1.0  
0.8  
0.6  
0.4  
0.2  
0.0

0

3

6

9

12

15

Time after treatment interruption (months)

PI group

NNRTI group

Log rank test, p = 0.026

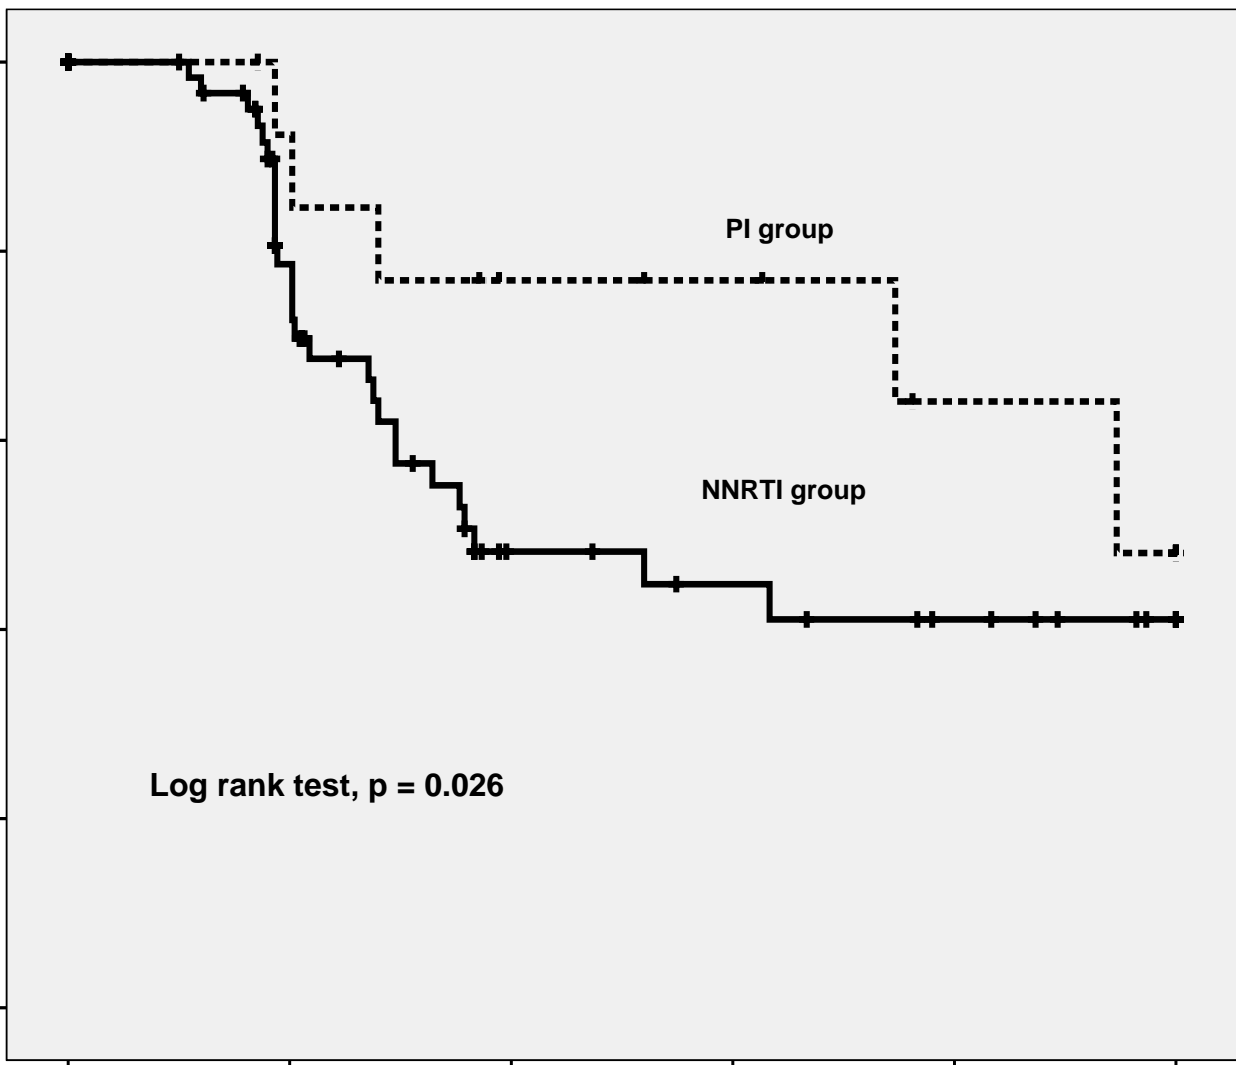

Supplement: MOESM2 [file 9603792]
